# Supplementary material for: The Drosophila early ovarian transcriptome provides insight to the molecular causes of recombination rate variation across genomes
Source: PubMed Central journal article supplement (PMC3840681; doi:10.1186/1471-2164-14-794), 2013-11-15

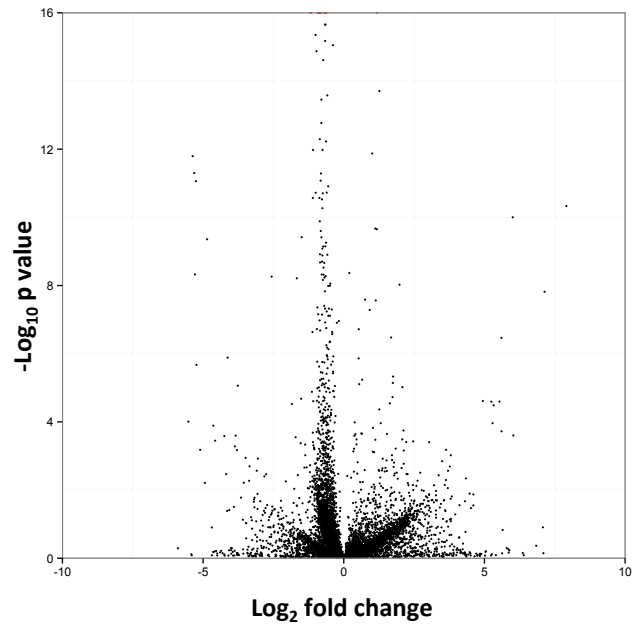

Supplement: 1471-2164-14-794-S3.pdf [file 1471-2164-14-794-S3.pdf]
